# Supplementary material for: Holocene Depositional History of Low-Lying Reef-Rim Carbonate Islets of Fakarava Atoll, Northwest Tuamotu, Central South Pacific
Source: MDPI journal article supplement (doi:10.3390/geosciences13120389), 2023-12-18
Supplement: s1 [file s1]

| Labcode | Samples | [ <sup>238</sup> U]<br>ppm | [ <sup>232</sup> Th]<br>ppb | δ <sup>234</sup> U <sub>M</sub><br>(‰) | ( <sup>230</sup> Th/ <sup>238</sup> U) | ( <sup>230</sup> Th/ <sup>232</sup> Th) | Age (ka)        | δ <sup>234</sup> U <sub>0</sub><br>(‰) | Age BP 2023 y | BP 1950 y |
|---------|---------|----------------------------|-----------------------------|----------------------------------------|----------------------------------------|-----------------------------------------|-----------------|----------------------------------------|---------------|-----------|
| 10369   | F41     | 2.574 ± 0.02068            | 0.0328 ± 0.00028            | 142.9 ± 1.2                            | 0.0038 ± 0.00004                       | 913.7 ± 9.6                             | 0.365 ± 0.00400 | 143.1 ± 1.2                            | 365 ± 5.0     | 292       |
| 10370   | F42     | 2.531 ± 0.02031            | 0.0029 ± 0.00005            | 145.9 ± 1.2                            | 0.0018 ± 0.00003                       | 4791.1 ± 85.0                           | 0.173 ± 0.00300 | 146.0 ± 1.2                            | 173 ± 3.0     | 100       |
| 10371   | F44     | 0.251 ± 0.00201            | 0.0570 ± 0.00050            | 147.0 ± 1.5                            | 0.0049 ± 0.00222                       | 65.4 ± 29.9                             | 0.464 ± 0.21300 | 147.2 ± 1.5                            | 415 ± 23.0    | 342       |
| 10372   | F46     | 2.698 ± 0.02166            | 0.0134 ± 0.00012            | 147.2 ± 0.9                            | 0.0058 ± 0.00005                       | 3584.5 ± 32.0                           | 0.558 ± 0.00550 | 147.5 ± 0.9                            | 556 ± 6.0     | 483       |
| 10409   | F48     | 2.412 ± 0.01962            | 0.0053 ± 0.00033            | 143.7 ± 2.0                            | 0.0090 ± 0.00006                       | 12530.8 ± 82.6                          | 0.861 ± 0.00700 | 144.0 ± 2.0                            | 861 ± 8.0     | 788       |
| 10359   | F50     | 0.381 ± 0.00307            | 0.0307 ± 0.00028            | 147.1 ± 4.7                            | 0.0043 ± 0.00024                       | 162.1 ± 9.2                             | 0.413 ± 0.02500 | 147.2 ± 4.7                            | 396 ± 34.0    | 323       |
| 10680   | F53     | 2.371 ± 0.01908            | 0.0036 ± 0.00007            | 148.1 ± 1.4                            | 0.0100 ± 0.00005                       | 19949.0 ± 105.2                         | 0.953 ± 0.00600 | 148.5 ± 1.4                            | 953 ± 7.0     | 880       |
| 10360   | F54     | 2.704 ± 0.02177            | 0.0220 ± 0.00019            | 144.5 ± 1.3                            | 0.0453 ± 0.00013                       | 16818.1 ± 50.3                          | 4.409 ± 0.01850 | 146.3 ± 1.3                            | 4.406 ± 20.0  | 4.333     |
| 10682   | F57     | 0.190 ± 0.00152            | 0.0045 ± 0.00011            | 145.9 ± 1.7                            | 0.0120 ± 0.00107                       | 1530.7 ± 137.3                          | 1.148 ± 0.10400 | 146.3 ± 1.7                            | 1.143 ± 10.0  | 1.070     |
| 10418   | F74     | 3.832 ± 0.03087            | 0.0182 ± 0.00016            | 143.9 ± 1.6                            | 0.0042 ± 0.00002                       | 2662.4 ± 15.9                           | 0.406 ± 0.00250 | 144.0 ± 1.6                            | 405 ± 3.0     | 332       |
| 10410   | F77     | 3.606 ± 0.02952            | 0.0335 ± 0.00036            | 147.75 ± 1.5                           | 0.00920 ± 0.00005                      | 3014.3 ± 17.1                           | 0.879 ± 0.00600 | 148.1 ± 1.5                            | 877 ± 7.0     | 804       |
| 10411   | F79     | 3.082 ± 0.02488            | 0.0390 ± 0.00032            | 146.9 ± 1.0                            | 0.0227 ± 0.00007                       | 5455.7 ± 16.1                           | 2.181 ± 0.00850 | 147.8 ± 1.0                            | 2.178 ± 9.0   | 2.105     |
| 10412   | F82     | 1.565 ± 0.01257            | 0.1594 ± 0.00130            | 143.5 ± 1.2                            | 0.0853 ± 0.00035                       | 2538.4 ± 10.6                           | 8.451 ± 0.04550 | 147.0 ± 1.3                            | 8.428 ± 57.0  | 8.355     |
| 10413   | F86B    | 3.062 ± 0.02457            | 0.0375 ± 0.00031            | 144.1 ± 0.7                            | 0.0216 ± 0.00007                       | 5345.1 ± 18.6                           | 2.084 ± 0.00850 | 145.0 ± 0.7                            | 2.080 ± 10.0  | 2.007     |
| 10419   | F86A    | 2.855 ± 0.02295            | 0.0389 ± 0.00032            | 141.6 ± 1.1                            | 0.0225 ± 0.00023                       | 4943.5 ± 50.6                           | 2.174 ± 0.02400 | 142.4 ± 1.1                            | 2.171 ± 26.0  | 2.098     |
| 10414   | F90     | 2.882 ± 0.02389            | 0.0254 ± 0.00021            | 146.6 ± 1.4                            | 0.0295 ± 0.00007                       | 10106.3 ± 24.8                          | 2.845 ± 0.01050 | 147.7 ± 1.4                            | 2.843 ± 12.0  | 2.770     |
| 10350   | F93     | 2.828 ± 0.02279            | 0.0340 ± 0.00028            | 141.6 ± 1.6                            | 0.0539 ± 0.00012                       | 13627.4 ± 30.3                          | 5.278 ± 0.01950 | 143.7 ± 1.6                            | 5.276 ± 21.0  | 5.203     |
| 10351   | F97     | 2.557 ± 0.02055            | 0.0157 ± 0.00013            | 144.1 ± 1.9                            | 0.0185 ± 0.00005                       | 9141.2 ± 23.2                           | 1.782 ± 0.00750 | 144.9 ± 1.9                            | 1.781 ± 8.0   | 1.708     |
| 10364   | F99     | 3.103 ± 0.02489            | 0.0128 ± 0.00011            | 143.9 ± 2.0                            | 0.0131 ± 0.00004                       | 9579.3 ± 32.9                           | 1.262 ± 0.00650 | 144.4 ± 2.0                            | 1.262 ± 7.0   | 1.189     |
| 10352   | F101    | 3.326 ± 0.02677            | 0.0437 ± 0.00035            | 145.7 ± 1.9                            | 0.0121 ± 0.00005                       | 2801.6 ± 10.5                           | 1.161 ± 0.00600 | 146.2 ± 1.9                            | 1.159 ± 8.0   | 1.086     |
| 10365   | F103    | 2.662 ± 0.02158            | 0.0160 ± 0.00016            | 138.2 ± 0.6                            | 0.0108 ± 0.00011                       | 5484.3 ± 40.2                           | 1.042 ± 0.01050 | 138.7 ± 0.6                            | 1.041 ± 12.0  | 968       |
| 10353   | F105    | 2.713 ± 0.02177            | 0.0589 ± 0.00048            | 145.0 ± 1.5                            | 0.0057 ± 0.00005                       | 803.1 ± 6.7                             | 0.549 ± 0.00500 | 145.3 ± 1.5                            | 545 ± 8.0     | 472       |
| 10362   | F 107   | 2.844 ± 0.02278            | 0.0312 ± 0.00025            | 147.8 ± 0.9                            | 0.0057 ± 0.00005                       | 1567.5 ± 14.8                           | 0.540 ± 0.00550 | 148.0 ± 0.9                            | 538 ± 7.0     | 465       |
| 10366   | F108    | 2.618 ± 0.02111            | 0.0194 ± 0.00017            | 145.9 ± 1.8                            | 0.0040 ± 0.00004                       | 1621.1 ± 18.3                           | 0.380 ± 0.00500 | 146.1 ± 1.8                            | 380 ± 6.0     | 307       |
| 10354   | F110    | 2.452 ± 0.01965            | 0.0223 ± 0.00019            | 147.0 ± 1.5                            | 0.0029 ± 0.00005                       | 963.2 ± 16.7                            | 0.277 ± 0.00500 | 147.1 ± 1.5                            | 276 ± 6.0     | 203       |
| 10355   | F113    | 2.353 ± 0.01887            | 0.0121 ± 0.00011            | 147.2 ± 1.4                            | 0.0038 ± 0.00004                       | 2242.3 ± 25.2                           | 0.363 ± 0.00450 | 147.4 ± 1.4                            | 363 ± 5.0     | 290       |
| 10367   | F120    | 2.898 ± 0.02333            | 0.0162 ± 0.00018            | 144.0 ± 2.5                            | 0.0195 ± 0.00011                       | 10387.5 ± 60.8                          | 1.874 ± 0.01500 | 144.8 ± 2.5                            | 1.868 ± 19.0  | 1.795     |
| 10415   | F124    | 3.579 ± 0.02991            | 0.0238 ± 0.00022            | 146.9 ± 1.7                            | 0.0030 ± 0.00004                       | 1344.3 ± 17.7                           | 0.283 ± 0.00400 | 147.0 ± 1.7                            | 282 ± 4.0     | 209       |
| 10416   | F127    | 2.900 ± 0.02440            | 0.0426 ± 0.00036            | 148.5 ± 0.9                            | 0.0046 ± 0.00005                       | 939.0 ± 9.7                             | 0.438 ± 0.00500 | 148.7 ± 0.9                            | 435 ± 7.0     | 362       |
| 10417   | F131    | 2.240 ± 0.01864            | 0.0360 ± 0.00032            | 146.3 ± 2.8                            | 0.0026 ± 0.00005                       | 484.3 ± 9.3                             | 0.248 ± 0.00550 | 146.4 ± 2.8                            | 244 ± 7.0     | 171       |
| 10368   | F137    | 2.349 ± 0.01898            | 0.0401 ± 0.00046            | 144.7 ± 2.0                            | 0.0111 ± 0.00009                       | 1961.2 ± 15.3                           | 1.060 ± 0.01000 | 145.1 ± 2.0                            | 1.058 ± 12.0  | 985       |
| 10357   | F140    | 2.580 ± 0.02070            | 0.5732 ± 0.00469            | 146.5 ± 1.3                            | 0.0342 ± 0.00016                       | 465.4 ± 2.2                             | 3.310 ± 0.01950 | 147.9 ± 1.3                            | 3.261 ± 43.0  | 3.188     |
| 10358   | F143    | 2.333 ± 0.01870            | 0.0250 ± 0.00020            | 145.1 ± 1.6                            | 0.0466 ± 0.00009                       | 13164.0 ± 25.3                          | 4.533 ± 0.01550 | 147.0 ± 1.6                            | 4.531 ± 16.0  | 4.458     |
| 10158   | FAK37   | 2.707 ± 0.02178            | 0.0075 ± 0.00007            | 146.2 ± 1.0                            | 0.0049 ± 0.00005                       | 5251.2 ± 53.5                           | 0.466 ± 0.00500 | 146.4 ± 1.0                            | 467 ± 5.0     | 394       |
| 10159   | FAK39   | 2.995 ± 0.02414            | 0.1110 ± 0.00091            | 147.1 ± 1.2                            | 0.0025 ± 0.00004                       | 203.4 ± 3.2                             | 0.237 ± 0.00400 | 147.2 ± 1.2                            | 230 ± 8.0     | 157       |
| 8032    | FAK40   | 3.084 ± 0.02521            | 0.0380 ± 0.00032            | 145.2 ± 1.5                            | 0.0088 ± 0.00006                       | 2202.9 ± 14.0                           | 0.846 ± 0.00700 | 145.6 ± 1.5                            | 847 ± 8.0     | 774       |
| 10160   | FAK41   | 2.395 ± 0.01921            | 0.0083 ± 0.00009            | 148.5 ± 1.5                            | 0.0076 ± 0.00005                       | 6689.1 ± 48.2                           | 0.727 ± 0.00600 | 148.8 ± 1.5                            | 728 ± 7.0     | 655       |
| 10161   | FAK43   | 2.540 ± 2.85000            | 0.0400 ± 0.00033            | 143.6 ± 0.9                            | 0.0081 ± 0.00004                       | 1591.4 ± 7.9                            | 0.779 ± 0.00450 | 143.9 ± 0.9                            | 777 ± 7.0     | 704       |
| 10162   | FAK46   | 2.099 ± 0.01681            | 0.1298 ± 0.00109            | 146.9 ± 1.6                            | 0.0421 ± 0.00034                       | 2102.6 ± 17.0                           | 4.081 ± 0.03950 | 148.6 ± 1.6                            | 4.069 ± 47.0  | 3.996     |
| 10163   | FAK48   | 2.674 ± 0.02155            | 0.0162 ± 0.00014            | 146.5 ± 1.4                            | 0.0164 ± 0.00008                       | 8359.2 ± 38.1                           | 1.569 ± 0.00900 | 147.2 ± 1.5                            | 1.569 ± 10.0  | 1.496     |
| 8026    | FAK49   | 3.059 ± 0.02464            | 0.0321 ± 0.00032            | 144.9 ± 1.3                            | 0.0170 ± 0.00012                       | 4980.3 ± 34.9                           | 1.631 ± 0.01350 | 145.6 ± 1.3                            | 1.633 ± 15.0  | 1.560     |
| 8031    | FAK50   | 2.192 ± 0.01760            | 0.0725 ± 0.00064            | 144.4 ± 1.2                            | 0.0765 ± 0.00054                       | 7091.2 ± 49.8                           | 7.545 ± 0.06350 | 147.5 ± 1.2                            | 7.538 ± 67.0  | 7.465     |
| 10164   | FAK51   | 0.757 ± 0.00607            | 0.0128 ± 0.00011            | 144.5 ± 1.1                            | 0.0076 ± 0.00010                       | 1395.6 ± 18.8                           | 0.724 ± 0.01100 | 144.8 ± 1.1                            | 772 ± 13.0    | 699       |
